# Supplementary material
Source: Springer Nature journal article supplement (https://www.springermedizin.de/resource/supplementary/12906_2012_1350_MOESM3_ESM.pdf/9522526)

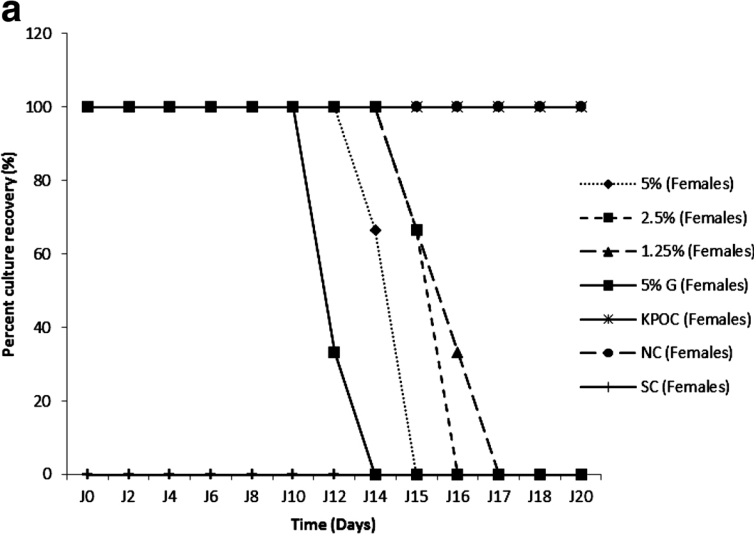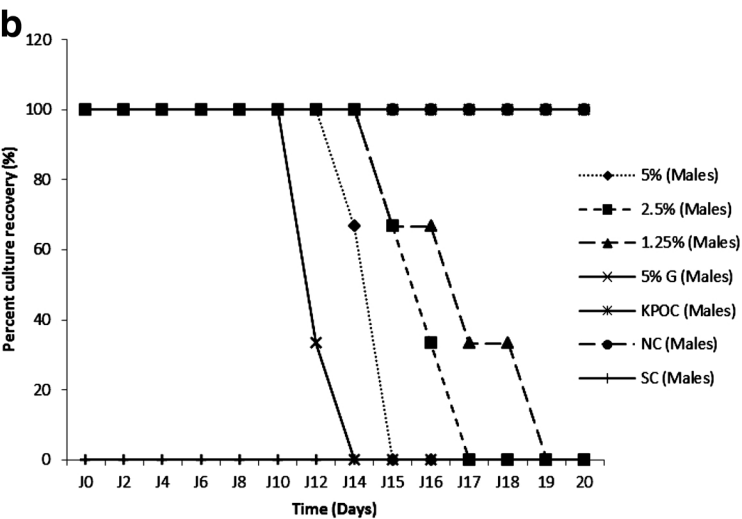

Supplement: MOESM3 [file 9522526]
